# Supplementary material for: The impacts of vitamin D supplementation on serum levels of thyroid autoantibodies in patients with autoimmune thyroid disease: a meta-analysis
Source: PeerJ journal article supplement (doi:10.7717/peerj.19541), 2025-06-16
Supplement: supplementary_file_1.docx [file supplementary_file_1.docx]

Search Strategy

1. PubMed, ‘Thyroiditis, Autoimmune’ [Title/Abstract])OR ‘Autoimmune Thyroid*’ [Title/Abstract] OR ‘thyroiditis’ [Title/Abstract] OR ‘Hashimoto* Disease’ [Title/Abstract] OR ‘Hashimoto* Thyroiditi*’ [Title/Abstract] OR ‘Chronic Lymphocytic Thyroiditis’ [Title/Abstract] OR ‘Graves* Disease’ [Title/Abstract] OR ‘Basedows Disease’ [Title/Abstract] OR ‘Exophthalmic Goiters’ [Title/Abstract] OR ‘Postpartum Thyroiditis’ [Title/Abstract] OR ‘Thyroiditis, Autoimmune’ [Mesh] AND ‘Vitamin D’ [Mesh] OR ‘vitamin D*’ [Title/Abstract] OR ‘Ergocalciferol’ [Title/Abstract] OR ‘Calciferol’ [Title/Abstract] OR ‘Cholecalciferol’ [Title/Abstract] OR ‘Dihydrotachysterol’ [Title/Abstract] OR ‘Calcifediol’ [Title/Abstract] OR ‘Calcitriol’ [Title/Abstract] OR ‘1, 25-(OH)2D3’ [Title/Abstract] OR ‘24,25-Dihydroxyvitamin D3’ [Title/Abstract] OR ‘25(OH)D’ [Title/Abstract] OR ‘25OHD’ [Title/Abstract]
2. EMBASE, ‘Thyroiditis, Autoimmune’:ab,ti OR ‘Autoimmune Thyroid*’:ab,ti OR ‘thyroiditis’:ab,ti OR ‘Hashimoto* Disease’:ab,ti OR ‘Hashimoto* Thyroiditi*’ :ab,ti OR ‘Chronic Lymphocytic Thyroiditis’:ab,ti OR ‘Graves* disease’ :ab,ti OR ‘Basedows Disease’:ab,ti OR ‘Exophthalmic goiters’:ab,ti OR ‘Postpartum Thyroiditis’:ab,ti OR ‘Autoimmune Thyroiditis’ /exp AND ‘Vitamin D’/exp OR ‘Vitamin D*’:ab,ti OR ‘Ergocalciferol’:ab,ti OR ‘Calciferol’:ab,ti OR ‘Cholecalciferol’:ab,ti OR ‘Dihydrotachysterol’:ab,ti OR ‘Calcifediol’:ab,ti OR ‘Calcitriol’:ab,ti OR ‘1,25-(OH)2D3’:ab,ti OR ‘24,25-Dihydroxyvitamin D3’ :ab,ti OR ‘25(OH)D’:ab,ti OR ‘25OHD’:ab,ti.
3. Web of Science, ‘Thyroiditis, Autoimmune’ (Topic) OR ‘Autoimmune Thyroid*’ (Topic) OR ‘thyroiditis’ (Topic) OR ‘Hashimoto* Disease’ (Topic) OR ‘Hashimoto* Thyroiditi*’ (Topic) OR ‘Chronic Lymphocytic Thyroiditis’ (Topic) OR ‘Graves* Disease’ (Topic) OR ‘Basedows Disease’ (Topic) OR ‘Exophthalmic Goiters’ (Topic) OR ‘Postpartum Thyroiditis’ (Topic) AND ‘Vitamin D’ (Topic) OR ‘Ergocalciferol’ (Topic) OR ‘Calciferol’ (Topic) OR ‘Cholecalciferol’ (Topic) OR ‘Dihydrotachysterol’ (Topic) OR ‘Calcifediol’ (Topic) OR ‘Calcitriol’ (Topic) OR ‘1, 25-(OH)2D3’ (Topic) OR ‘24,25-Dihydroxyvitamin D3’ (Topic) OR ‘25(OH)D’ (Topic) OR ‘25OHD’ (Topic)
4. Cochrane, ‘Thyroiditis, Autoimmune’:ti,ab,kw OR ‘Autoimmune Thyroid*’:ti,ab,kw OR ‘thyroiditis’:ti,ab,kw OR ‘Hashimoto* Disease’:ti,ab,kw OR ‘Hashimoto* Thyroiditi*’:ti,ab,kw OR ‘Chronic Lymphocytic Thyroiditis’: ti,ab,kw OR ‘Graves* disease’:ti,ab,kw OR ‘Basedows Disease’: ti,ab,kw OR ‘Exophthalmic goiters’:ti,ab,kw OR ‘Postpartum Thyroiditis’:ti,ab,kw OR “MESH descriptor:‘Autoimmune Thyroiditis’ explode all trees” AND “MESH descriptor: ‘Vitamin D’ explode all trees” OR ‘Vitamin D*’ :ti,ab,kw OR ‘Ergocalciferol’ :ti,ab,kw OR ‘Calciferol’ :ti,ab,kw OR ‘Cholecalciferol’ :ti,ab,kw OR ‘Dihydrotachysterol’ :ti,ab,kw OR ‘Calcifediol’ :ti,ab,kw OR ‘Calcitriol’ :ti,ab,kw OR ‘1,25-(OH)2D3’ :ti,ab,kw OR ‘24,25-Dihydroxyvitamin D3’ :ti,ab,kw OR ‘25(OH)D’ :ti,ab,kw OR ‘25OHD’ :ti,ab,kw
