# Supplementary material for: The impacts of vitamin D supplementation on serum levels of thyroid autoantibodies in patients with autoimmune thyroid disease: a meta-analysis
Source: PeerJ journal article supplement (doi:10.7717/peerj.19541), 2025-06-16
Supplement: supplementary_file_3.docx [file supplementary_file_3.docx]

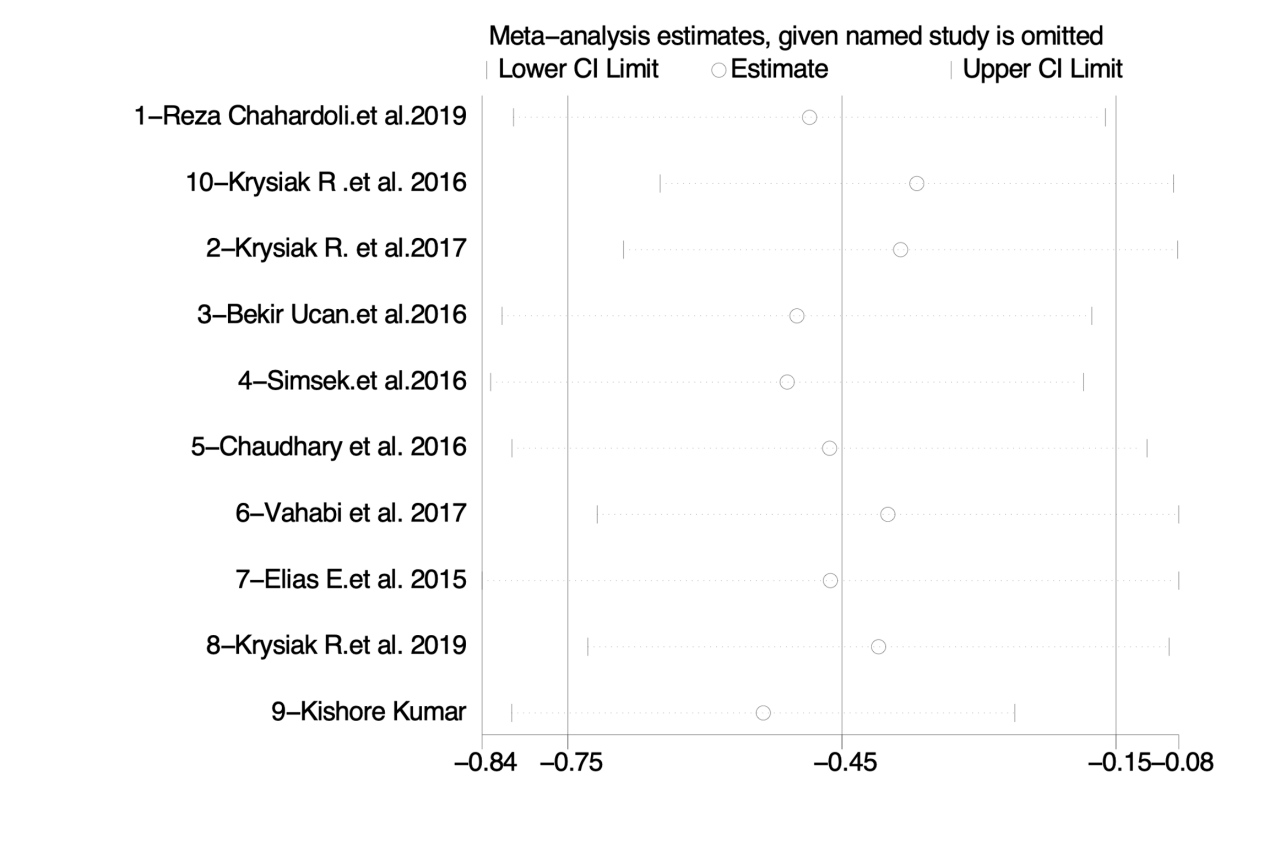


Fig 1 Sensitivity testing of Anti-thyroid peroxidase antibodies based on the whole 10 prospective studies severity score.


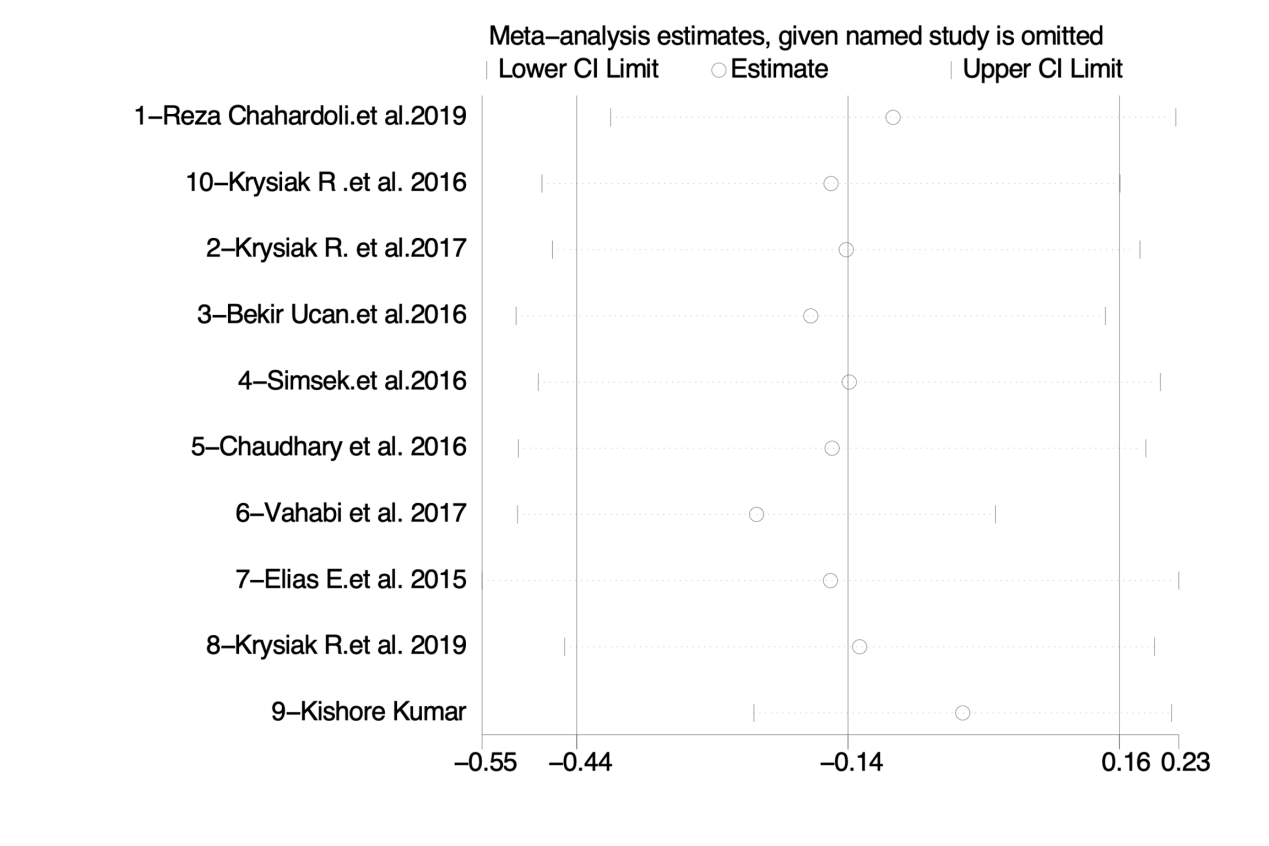


Fig 2  Sensitivity testing of thyroid-stimulating hormone levels based on the whole 10 prospective studies severity score.


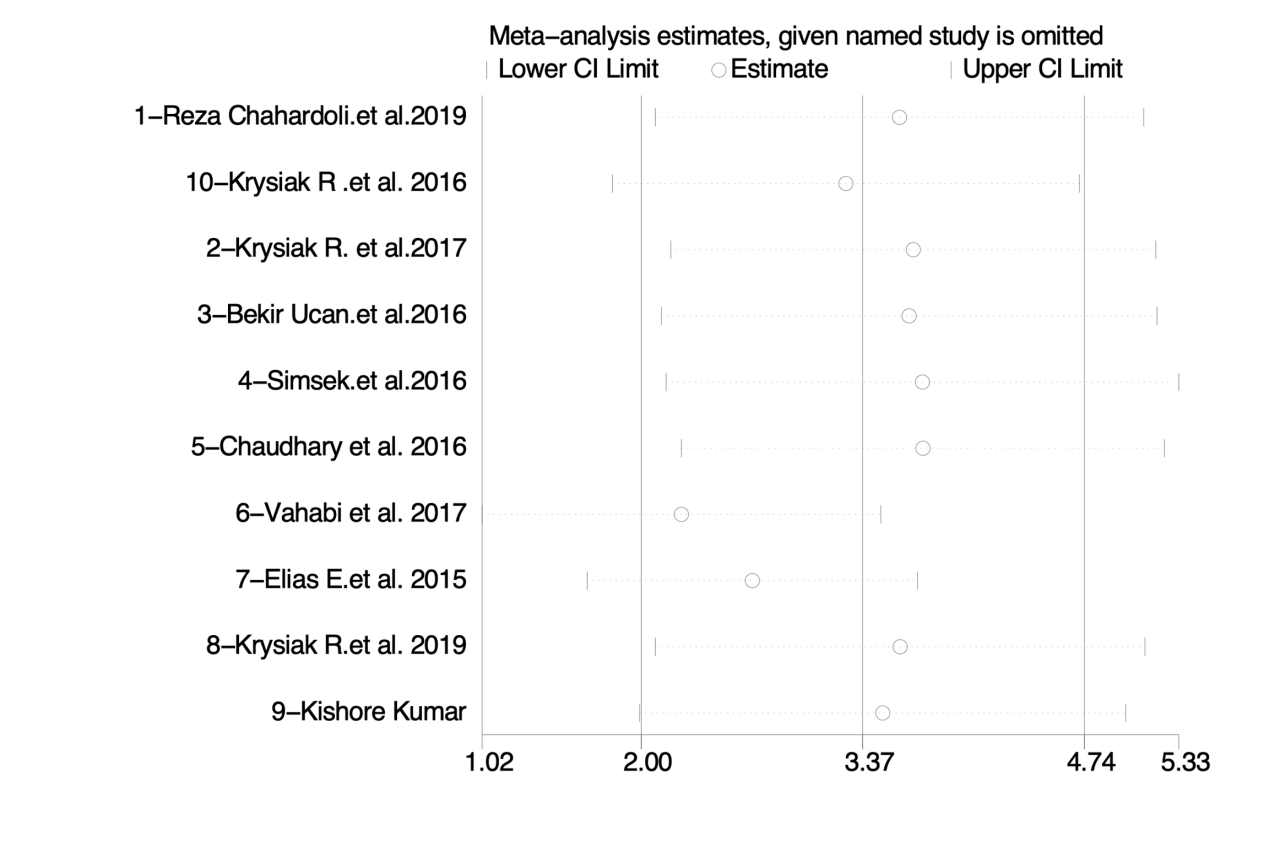


Fig 3 Sensitivity testing of 25(OH)D levels based on the whole 10 prospective studies severity score.


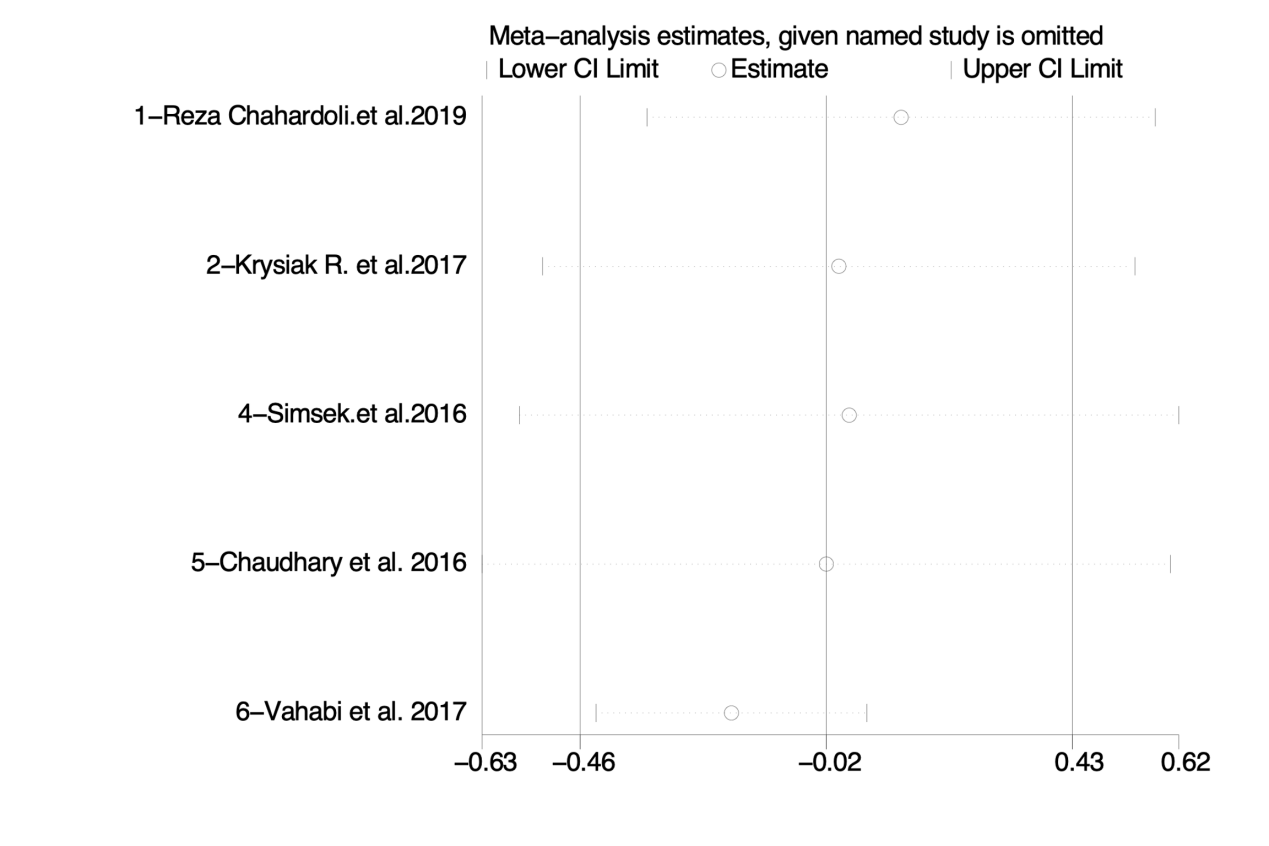


Fig 4 Sensitivity testing of thyroid-stimulating hormone levels based on the 5 randomized controlled trials severity score.


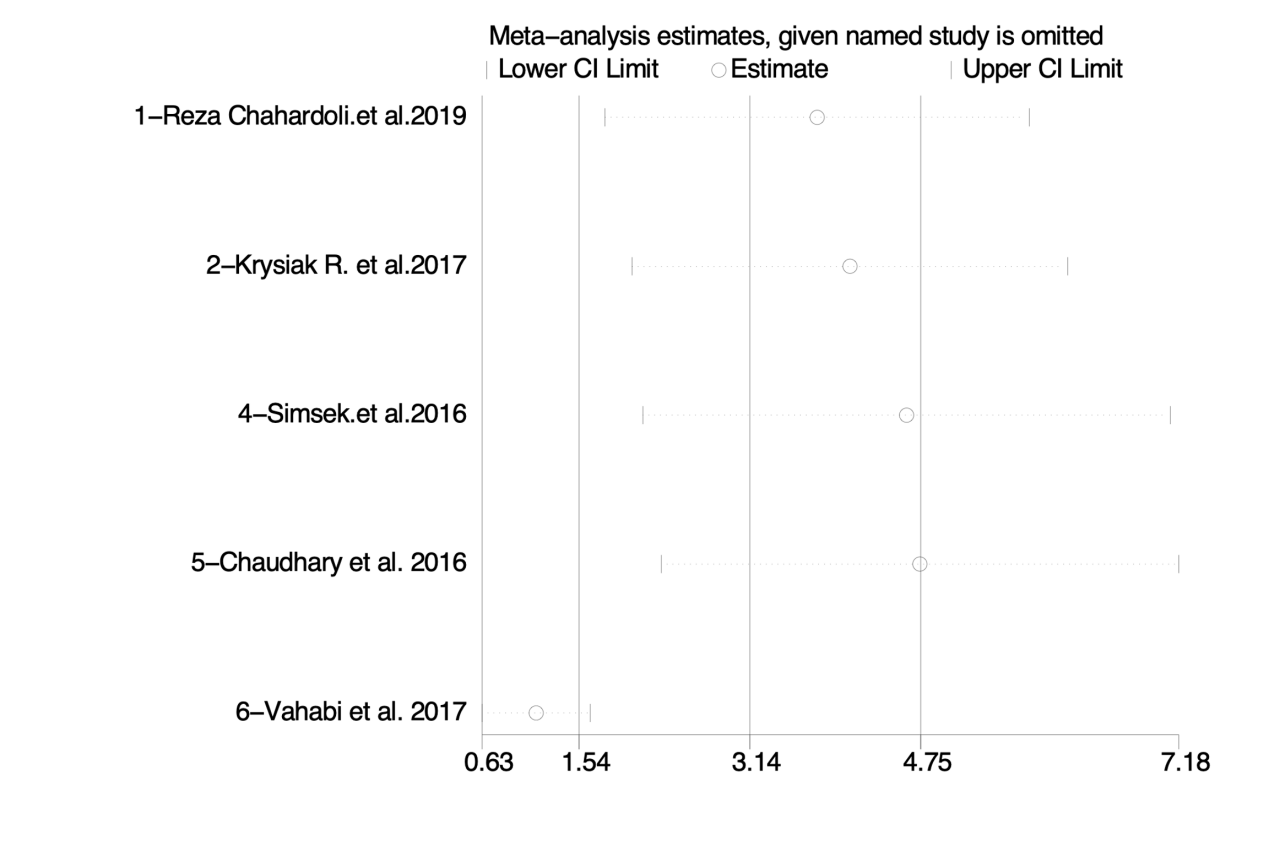
Fig 5 Sensitivity testing of 25(OH)D levels based on the 5 randomized controlled trials severity score.


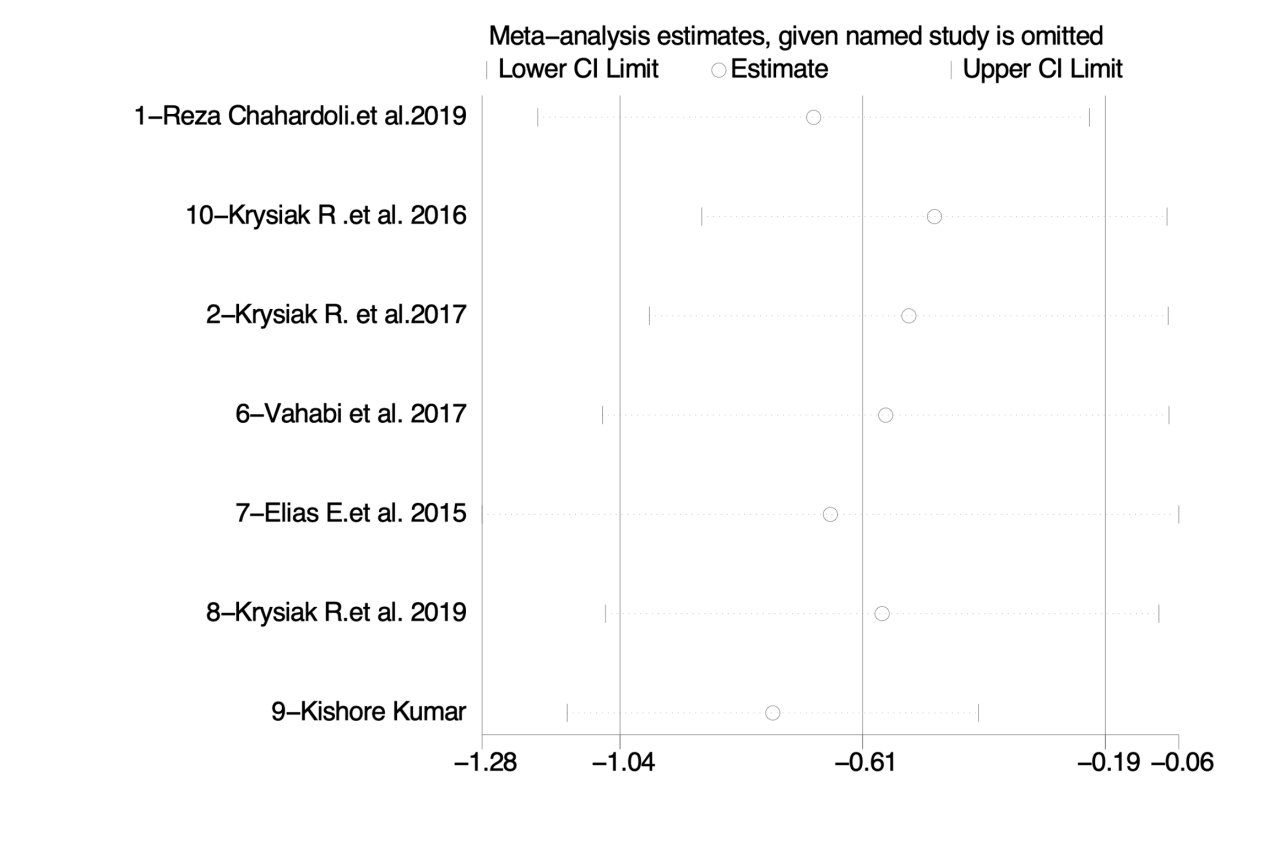


Fig 6 Sensitivity testing of Anti-thyroid peroxidase antibodies in the 10 prospective studies classified by the duration time of VitD supplementation ≥3 months severity score.


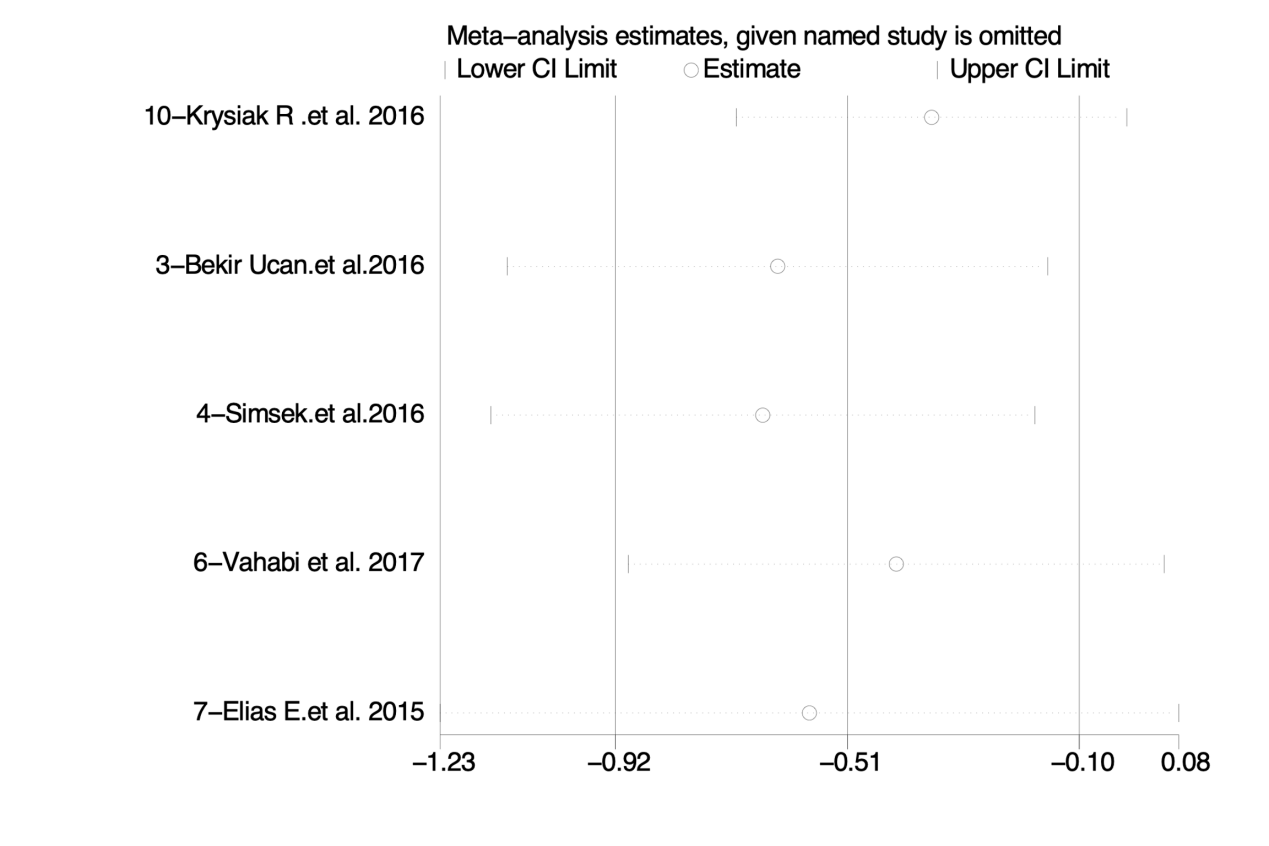


Fig 7 Sensitivity testing of anti-thyroglobulin antibody in the 10 prospective studies classified by initial serum 25(OH)D < 30ng/ml severity score.


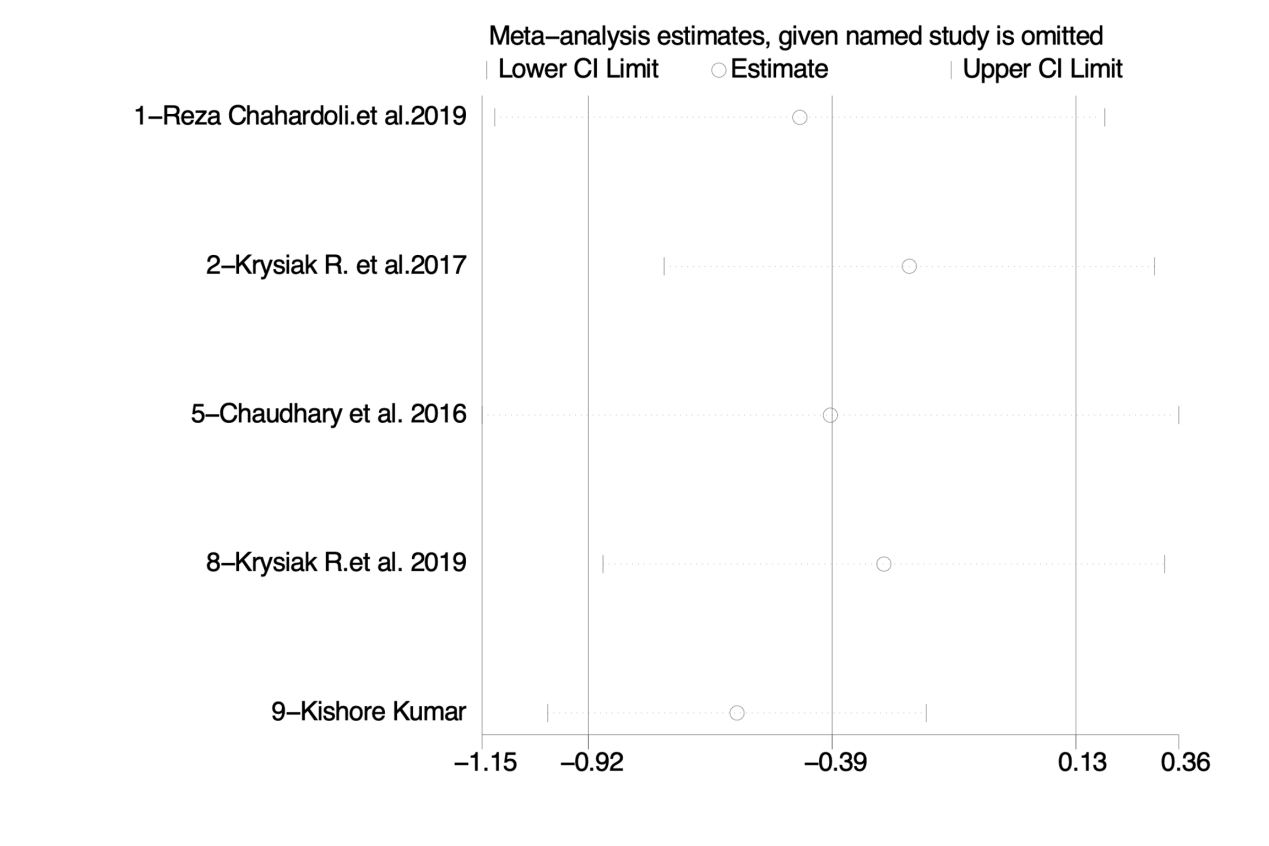


Fig 8 Sensitivity testing of anti-thyroglobulin antibody in the 10 prospective studies classified by without initial VitD status considered severity score.


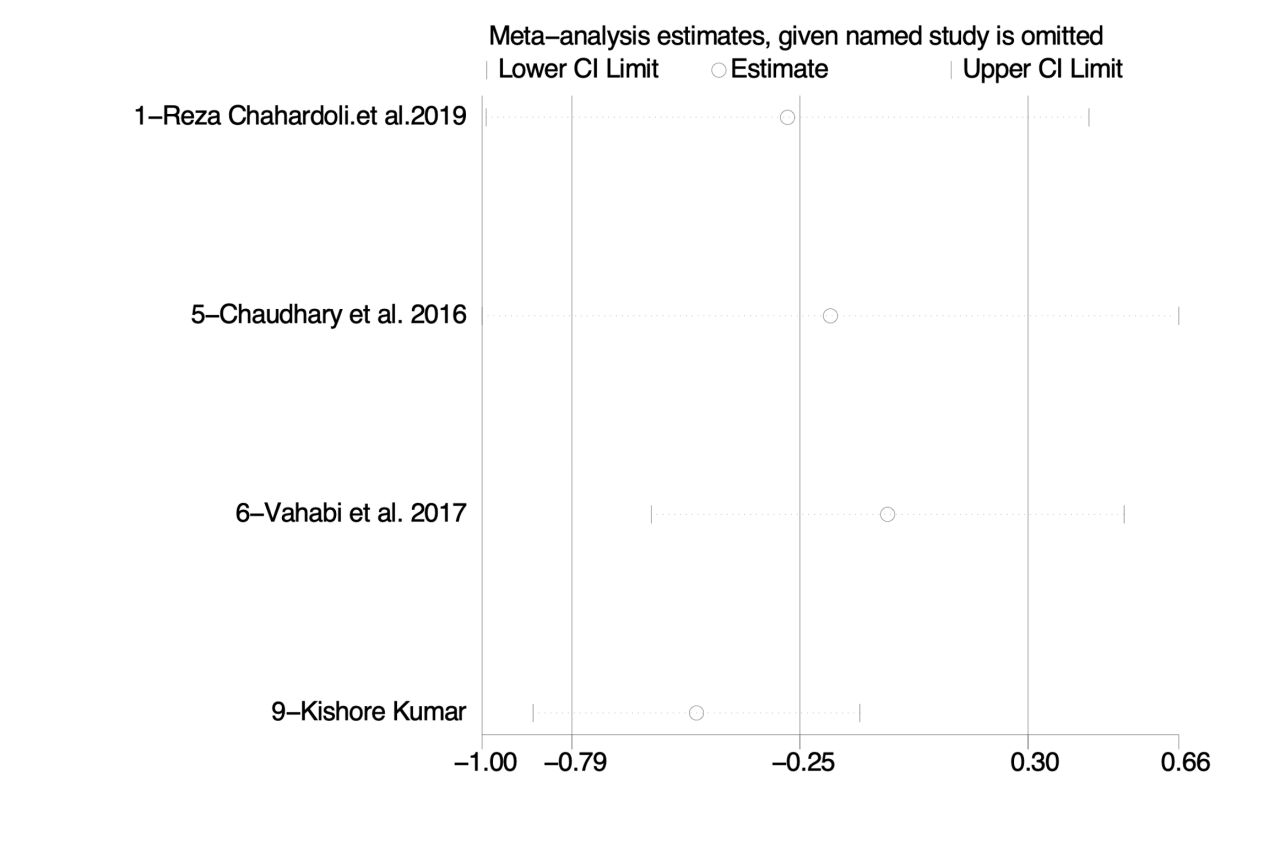


Fig 9 Sensitivity testing of anti-thyroid peroxidase antibody in AITD patients with weekly VitD supplementation severity score.


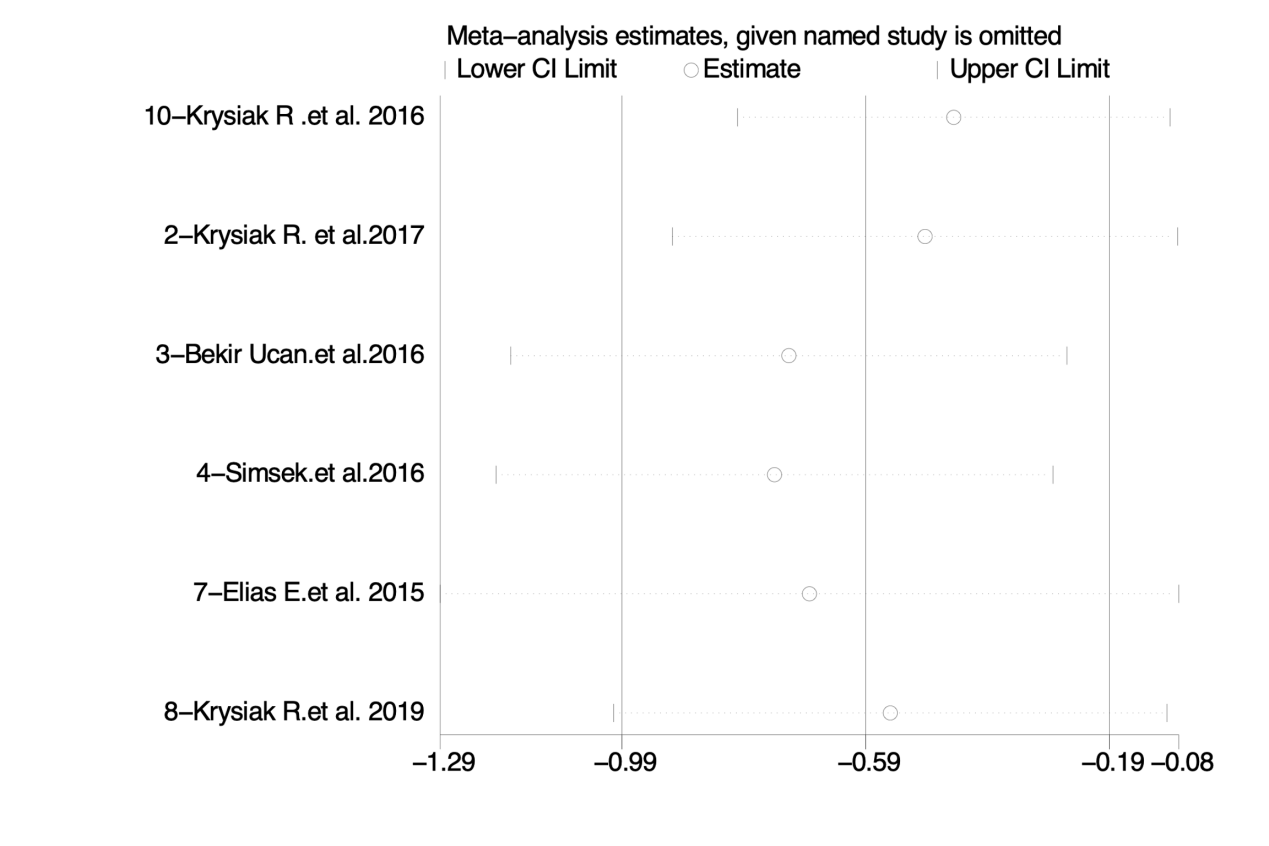


Fig 10 Sensitivity testing of anti-thyroid peroxidase antibody in AITD patients with daily VitD supplementation severity score.
